# Supplementary material for: Hydrothermal pre-treatment for mesoporous carbon synthesis: enhancement of chemical activation
Source: Royal Society of Chemistry journal article supplement (doi:10.1039/c3ta12648j), 2013-10-30
Supplement: c3ta12648j.pdf [file c3ta12648j.pdf]

## Supporting Information:

| Sample  | Coconut shell | ZP-[2] | HT    | ZHT-[2] | HTZP-[2] | ZHTP-[2] |
|---------|---------------|--------|-------|---------|----------|----------|
| %N      | 1.08          | 1.72   | 1.44  | 0.925   | 2.4      | 2.83     |
| %C      | 46.39         | 86.55  | 68.13 | 57.22   | 86       | 81.94    |
| %H      | 5.65          | 1.52   | 4.86  | 4.28    | 1.6      | 1.57     |
| %S      | 0.64          | 0.52   | 0.4   | 0.29    | 0.5      | 0.43     |
| %O      | 46.24         | 9.69   | 25.17 | 37.3    | 9.5      | 13.23    |
| H/C     |               |        |       |         |          |          |
| (molar) |               | 0.211  | 0.856 | 0.898   | 0.223    | 0.230    |
| O/C     |               |        |       |         |          |          |
| (molar) |               | 0.08   | 0.27  | 0.49    | 0.083    | 0.12     |
| %O      |               |        |       |         |          |          |
| Yield   |               | 4.9    | 29.4  | 32.7    | 4.3      | 6.3      |

Table S1: Elemental analysis of hydrothermally pretreated shell and carbons

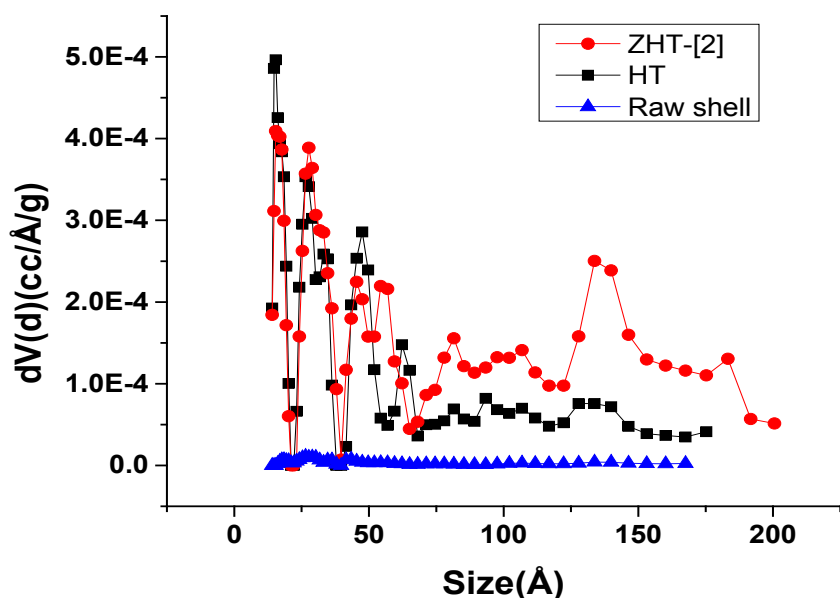

Figure S1: Pore size distribution of hydrothermally treated shell, HT and ZHT-[2].

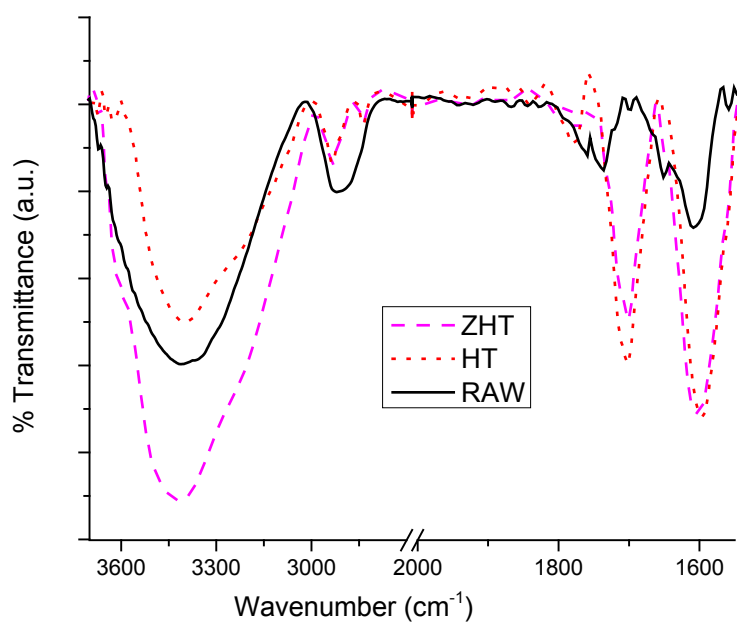

**Figure S2: FT-IR spectra for Raw shell, HT and ZHT-[2]**

| Activated carbons      | $Q_0$ (mg/g) | $b$ (L/mg) | $R^2$ |
|------------------------|--------------|------------|-------|
| Commercial_microporous | 98.7         | 0.138      | 0.994 |
| Commercial_mesoporous  | 256.4        | .069       | 0.987 |
| HTP                    | 99.3         | 0.126      | 0.989 |
| ZP-[2]                 | 434.7        | 0.267      | 0.998 |
| ZHTP-[2]               | 526.3        | 0.463      | 0.998 |

**Table S2: Langmuir parameters (Methylene blue)**

| Activated carbons      | $Q_0$ (mg/g) | $b$ (L/mg) | $R^2$ |
|------------------------|--------------|------------|-------|
| Commercial_microporous | 134.6        | 0.009      | 0.995 |
| Commercial_mesoporous  | 450.3        | 0.047      | 0.983 |
| HTP                    | 142.3        | 0.018      | 0.966 |
| ZP-[2]                 | 463.2        | 0.124      | 0.998 |
| ZHTP-[2]               | 630.3        | 0.501      | 0.999 |

**Table S3: Langmuir parameters (Erythrosine red)**
